# Supplementary material for: The Cultural Impact of Video Games: A Systematic Review of the Literature
Source: MDPI journal article supplement (doi:10.3390/educsci13111116), 2023-11-07
Supplement: s1 [file s1]

Archive with 1 entries (1 files):
- education-2676219-supplementary.pdf
